# Supplementary material for: Biosynthetic pathways to dichloroimines; precursor incorporation studies on terpene metabolites in the tropical marine sponge Stylotella aurantium
Source: Royal Society of Chemistry journal article supplement (doi:10.1039/b315895k), 2004-01-01

Jamie S. Simpson, Andreas Brust and Mary J. Garson.

## Supplementary data

### Table of Contents

|                                                                               |    |
|-------------------------------------------------------------------------------|----|
| <b>Figure S1.</b> <sup>1</sup> H NMR spectrum for isocyanide <b>5</b>         | S2 |
| <b>Figure S2.</b> <sup>13</sup> C NMR spectrum for isocyanide <b>5</b>        | S2 |
| <b>Figure S3.</b> GCMS of isocyanide <b>5</b>                                 | S3 |
| <b>Figure S4.</b> <sup>1</sup> H NMR spectrum for formamide <b>9</b>          | S4 |
| <b>Figure S5.</b> <sup>13</sup> C NMR spectrum for formamide <b>9</b>         | S4 |
| <b>Figure S6.</b> GCMS of formamide <b>9</b>                                  | S5 |
| <b>Figure S7.</b> <sup>1</sup> H NMR spectrum for cyclic carbamate <b>10</b>  | S6 |
| <b>Figure S8.</b> <sup>13</sup> C NMR spectrum for cyclic carbamate <b>10</b> | S6 |

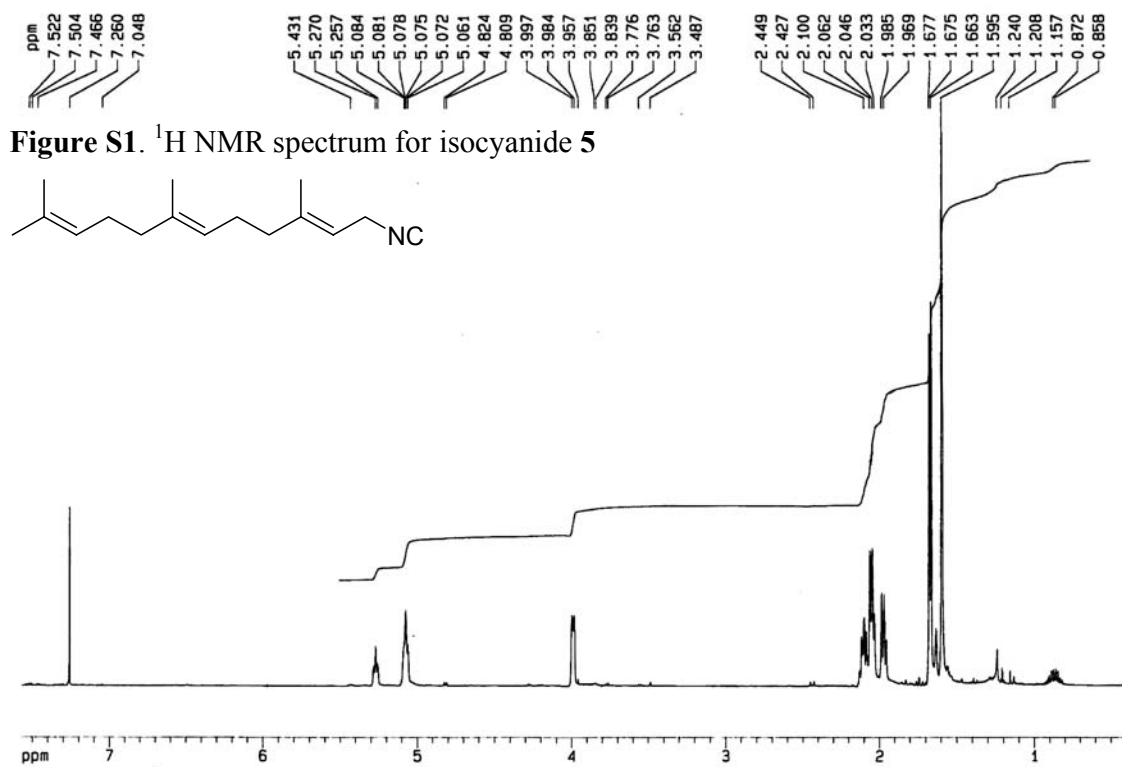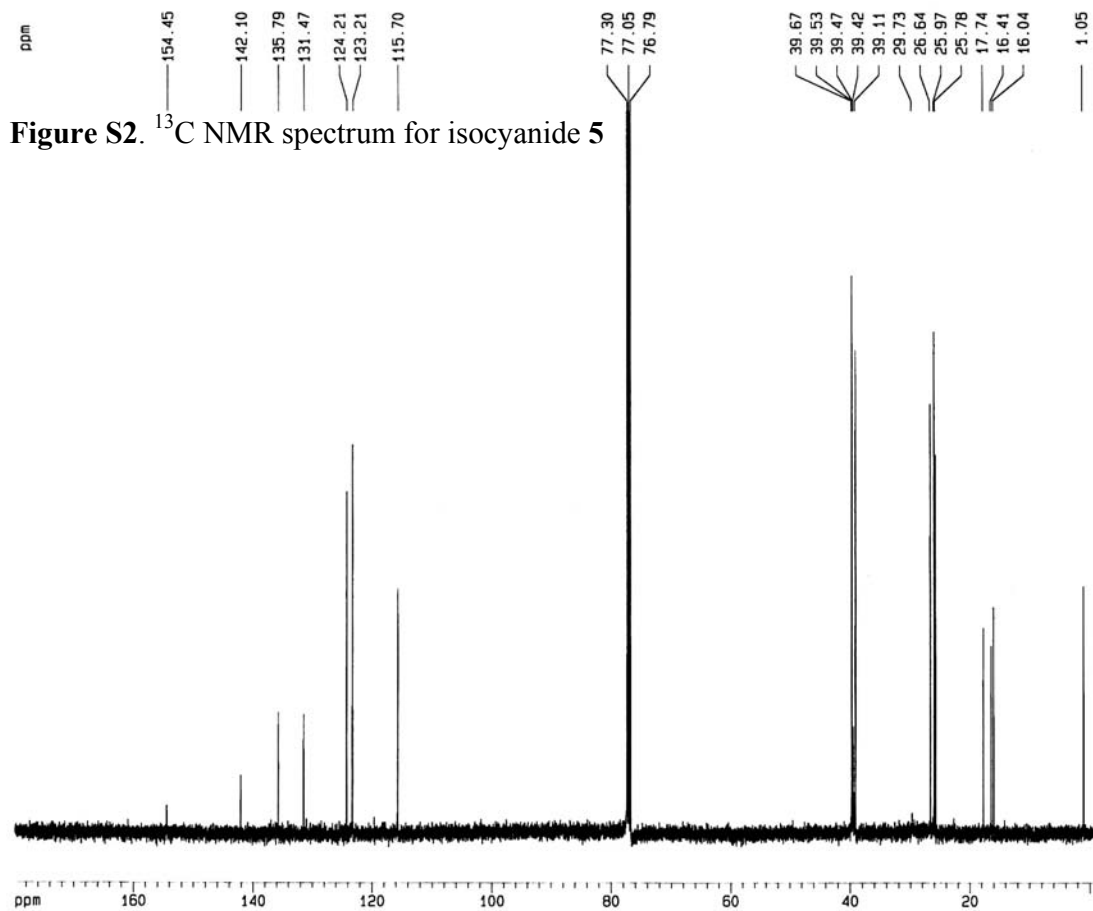

**Figure S3.** GCMS of isocyanide **5**

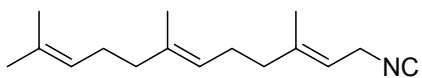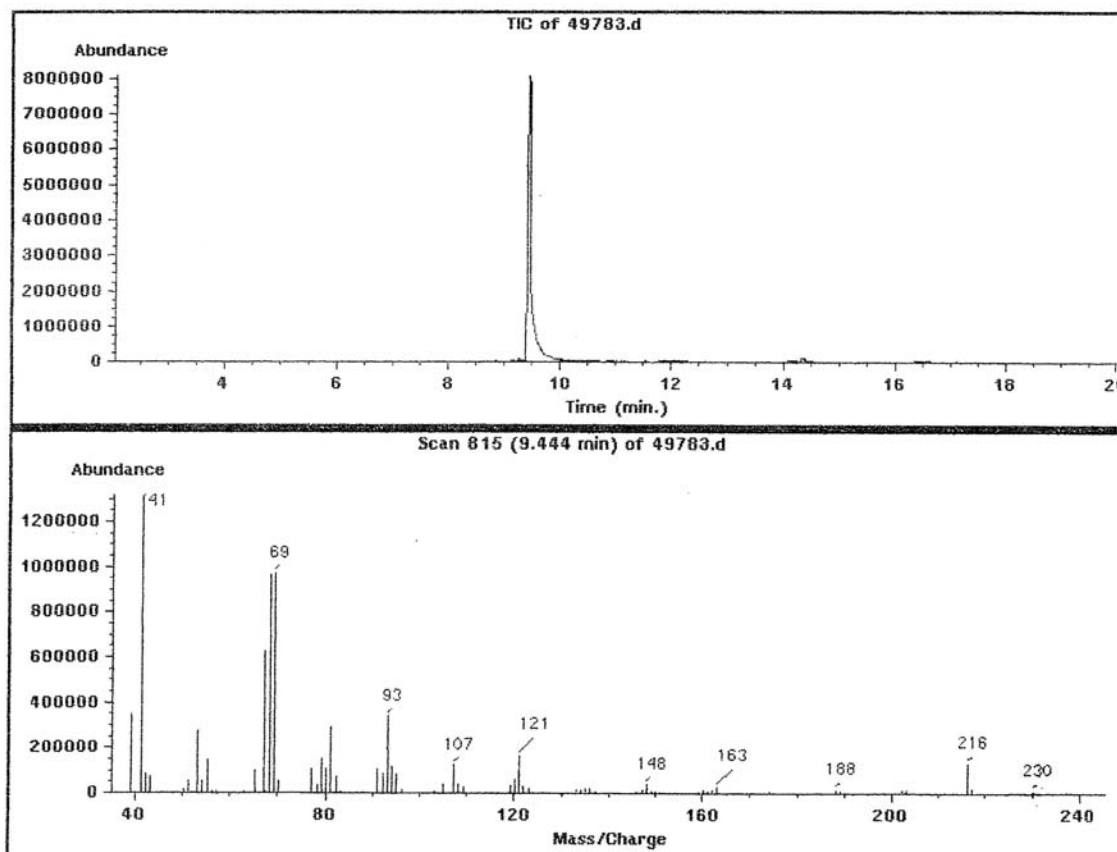



Figure S6. GCMS of formamide 9

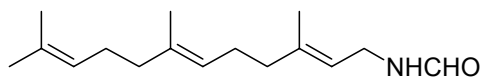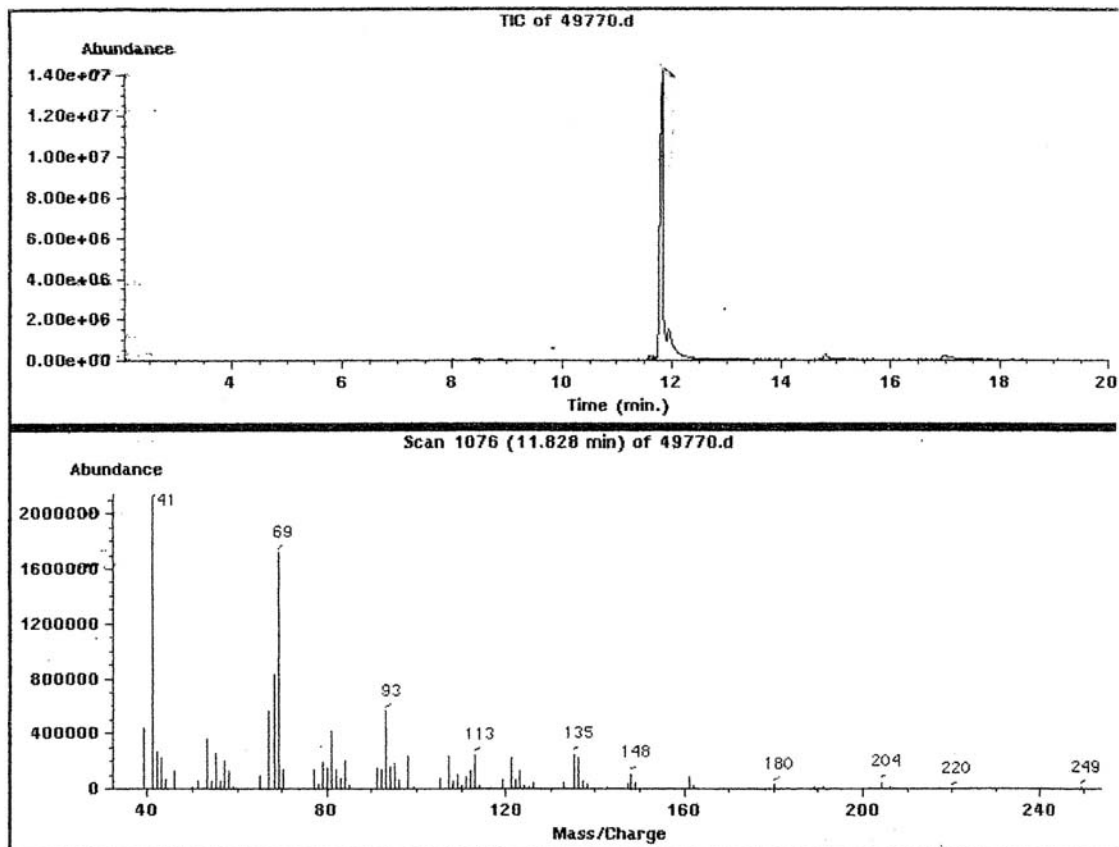

Supplement: b315895k.pdf [file b315895k.pdf]
